# Supplementary material for: A pentameric protein ring with novel architecture is required for herpesviral packaging
Source: eLife. 2021 Feb 8;10:e62261. doi: 10.7554/eLife.62261 (PMC7889075; doi:10.7554/eLife.62261)
Supplement: Supplementary file 3. [file elife-62261-supp3.xlsx]

## Sheet: Sheet1 (2)
#	Name	Sequence	Purpose
1	ORF68-F	GAGAAGGGGGCGGCCATGTTTGTTCCCTGGCAACTCG	Cloning
2	ORF68-R	GCCCTCTAGACTCGATTAAGCGTACAAGTGTGACGTCTG	Cloning
3	ORF68-tagless-F	TGGAATTCTGCAGATATGTTTGTTCCCTGGCAACTCG	Cloning
4	ORF68-tagless-R	GCCACTGTGCTGGATTCAAGCGTACAAGTGTGACGTCT	Cloning
5	BFLF1-F	GAGAAGGGGGCGGCCATGGAGGACTTTGTGCCCTGG	Cloning
6	BFLF1-R	GCCCTCTAGACTCGATTACACGTAGACCTGGGAAGTTTG	Cloning
7	mu68-F	GAGAAGGGGGCGGCCATGTACGTACCATGGTCTCTAGAG	Cloning
8	mu68-R	GCCCTCTAGACTCGATTAGGTGTAAACAGAAAAGAAATGCAC	Cloning
9	UL52-F	GAGAAGGGGGCGGCCATGAATCCGAGTACCCACGTGAG	Cloning
10	UL52-R	GCCCTCTAGACTCGATTAGACATACTTGTCTATCACGTACG	Cloning
11	UL32-nest-F	GTCTGGGACCGCAGCGCGCAGTCGG	Cloning
12	UL32-nest-R	ACGGCAAGGAGCGCCGGCGGTCGCG	Cloning
13	UL32-F	GAGAAGGGGGCGGCCATGGCAACTTCGCCCCCC	Cloning
14	UL32-R	GCCCTCTAGACTCGATCATACATAGGTACACAGGGTGTGC	Cloning
15	pUE1-F	TGATCGACCTGCAGGCATGC	Cloning
16	pUE1-R	GGGCCCCTGGAACAGAACTTCC	Cloning
17	pUE1-ORF68-F	CTGTTCCAGGGGCCCATGTTTGTTCCCTGGCAACTCG	Cloning
18	pUE1-ORF68-R	CCTGCAGGTCGATCAAGCGTACAAGTGTGACGTCTG	Cloning
19	pUE1-BFLF1-F	CTGTTCCAGGGGCCCATGGAGGACTTTGTGCCCTGG	Cloning
20	pUE1-BFLF1-R	CCTGCAGGTCGATCACACGTAGACCTGGGAAGTTTG	Cloning
21	pUE1-UL32-F	CTGTTCCAGGGGCCCATGGCAACTTCGCCCCCC	Cloning
22	pUE1-UL32-R	CCTGCAGGTCGATCATCATACATAGGTACACAGGGTGTGC	Cloning
23	pLJM1-Nstrep-ORF68-F	CGCTAGCGCTACCGGATGTGGAGCCACCCCCAG	Cloning
24	pLJM1-Nstrep-ORF68-R	TCGAGGTCGAGAATTTTAAGCGTACAAGTGTGACGTCTG	Cloning
25	pLJM1-Nstrep-BFLF1-F	CGCTAGCGCTACCGGATGTGGAGCCACCCCCAG	Cloning
26	pLJM1-Nstrep-BFLF1-R	TCGAGGTCGAGAATTTTACACGTAGACCTGGGAAGTTTG	Cloning
27	pLJM1-Nstrep-mu68-F	CGCTAGCGCTACCGGATGTGGAGCCACCCCCAG	Cloning
28	pLJM1-Nstrep-mu68-R	TCGAGGTCGAGAATTTTAGGTGTAAACAGAAAAGAAATGC	Cloning
29	pLJM1-Nstrep-UL52-F	CGCTAGCGCTACCGGATGTGGAGCCACCCCCAG	Cloning
30	pLJM1-Nstrep-UL52-R	TCGAGGTCGAGAATTTTAGACATACTTGTCTATCACGTAC	Cloning
31	pLJM1-UL32-F	CGCTAGCGCTACCGGATGGCAACTTCGCCCCCC	Cloning
32	pLJM1-UL32-R	TCGAGGTCGAGAATTTCATACATAGGTACACAGGGTG	Cloning
33	ORF68-C52A-F	GCCagggtctgtcagctcctattttctctggtc	Cloning
34	ORF68-C52-R	gggggaagatggttggagcgactggtgaat	Cloning
35	ORF68-C373A-F	GCCgccctcaatgctaaggtggtgtcagaggac	Cloning
36	ORF68-C373-R	cagcgggtcgcagaacaggtgcttgtgaatttc	Cloning
37	ORF68-C191A/192A-F	GCCGCCcagattacagacaccaccaccgcacccgcg	Cloning
38	ORF68-C191-R	tggggtggggccggtggcctcctccttgtc	Cloning
39	ORF68-C415A-F	GCCgaggtcgtgcagactttggtctttctcttt	Cloning
40	ORF68-C415-R	gtcgaacagggtgttggcatcgaggagctg	Cloning
41	ORF68-H452A-F	GCCcgcctagacctggcccacccctcacagacg	Cloning
42	ORF68-H452-R	tctttttagttgtgcggttagctcccgaat	Cloning
43	ORF68-C79A-F	GCCttcttctgtctatacgccccacactgctgg	Cloning
44	ORF68-C79-R	gaggcaggcatagtcctcgaagaaacccat	Cloning
45	UL32-C128A-F	GCCctggtctgccgcaccatcgagctgtacaag	Cloning
46	UL32-C128-R	gggccggtccagcgcgaaggtgtcgatggc	Cloning
47	UL32-C502A-F	GCCgccatcacggagatggaggttgacccctgg	Cloning
48	UL32-C502-R	catggggtcacagaacatgtgcttaaagat	Cloning
49	UL32-C308A/C309A-F	GCCGCCacgcgcgccgccgctcgcaacggggaattc	Cloning
50	UL32-C308-R	gctgtccccgcccccgcgccgaccctccgt	Cloning
51	UL32-C544A-F	GCCatagcgttgcgtgccctcatctacaccttc	Cloning
52	UL32-C544-R	gacacgcccctcgaactcgttcccgcaggc	Cloning
53	UL32-H581A-F	GCCtcgatctcgctcctgtccctggagcacacc	Cloning
54	UL32-H581-R	gcgtctaagcagcgcgcccgcctcacggac	Cloning
55	UL32-C155A-F	GCCgccaaatgcctgggggcgccccactgcgcc	Cloning
56	UL32-C155-R	gagaaacgcgtaatcggccacccactgggg	Cloning
57	ORF68-K435A-F	GCCaccacctcactagacattattcgggagcta	Cloning
58	ORF68-K435-R	ccccaccctggcgttttggagacccttaaa	Cloning
59	ORF68-R443A-F	GCCgagctaaccgcacaactaaaaagacaccgc	Cloning
60	ORF68-R443-R	aataatgtctagtgaggtggttttccccac	Cloning
61	ORF68-K450A/R451A-F	GCCGCCcaccgcctagacctggcccacccctcacag	Cloning
62	ORF68-K450-R	tagttgtgcggttagctcccgaataatgtc	Cloning
63	ORF68-K174A/R179A/K182A-F	GCCacgtcctggcccGCCacagacGCCgaggaggccaccggccccaccccatgctgc	Cloning
64	ORF68-K174-R	gaagcagaagttgcaggtgatggtgcctgt	Cloning
65	ORF68-R14A-F	GCCgatgagctccaaaaactactggcagcctcc	Cloning
66	ORF68-R14-R	gtgacgggtaattgtaccgagttgccaggg	Cloning
67	ORF68-K310A-F	GCCgcgctgcagacccttcagtgcgaggtaatg	Cloning
68	ORF68-K310-R	gggtgcctctgggtgtgccgcaaggcactc	Cloning
69	ORF68-K395A/K396A-F	GCGGCGctcagggcatccgcggccgccggacagctc	Cloning
70	ORF68-K395-R	atactcctgctccctgggcaggcggaatag	Cloning
71	ORF57Pr-F	cagtgttttgccagcaagtg	qPCR
72	ORF57Pr-R	gggctattttgggaacctg	qPCR
73	CTGFPr-F	cgaggaatgtccctgtttgt	qPCR
74	CTGFPr-R	actggctgtctcctctcagc	qPCR
75	dsLBS_10bp	/56-FAM/TCCCGCCCGG-3' + 5'-CCGGGCGGGA-3'	EMSA
76	dsLBS1_20bp	/56-FAM/TCCCGCCCGGGCATGGGGCC-3' + 5'-GGCCCCATGCCCGGGCGGGA-3'	EMSA
77	dsLBS_30bp	/56-FAM/CGCCTCCCGCCCGGGCATGGGGCCGCGCGC-3' + 5'-GCGCGCGGCCCCATGCCCGGGCGGGAGGCG-3'	EMSA
78	dsSCRAM_20bp	/56-FAM/TTGGTTGCCAAGACGACATC-3' + 5'-GATGTCGTCTTGGCAACCAA-3'	EMSA

## Sheet: Sheet1
#	Name	Sequence	Purpose	Details
1	ORF68-F	GAGAAGGGGGCGGCCATGTTTGTTCCCTGGCAACTCG	Cloning	Used to clone ORF68 into NotI/XhoI-cut pcDNA4/TO-2xStrep (N-terminal)
2	ORF68-R	GCCCTCTAGACTCGATTAAGCGTACAAGTGTGACGTCTG	Cloning	Used to clone ORF68 into NotI/XhoI-cut pcDNA4/TO-2xStrep (N-terminal)
3	BFLF1-F	GAGAAGGGGGCGGCCATGGAGGACTTTGTGCCCTGG	Cloning	Used to clone BFLF1 into NotI/XhoI-cut pcDNA4/TO-2xStrep (N-terminal)
4	BFLF1-R	GCCCTCTAGACTCGATTACACGTAGACCTGGGAAGTTTG	Cloning	Used to clone BFLF1 into NotI/XhoI-cut pcDNA4/TO-2xStrep (N-terminal)
5	mu68-F	GAGAAGGGGGCGGCCATGTACGTACCATGGTCTCTAGAG	Cloning	Used to clone mu68 into NotI/XhoI-cut pcDNA4/TO-2xStrep (N-terminal)
6	mu68-R	GCCCTCTAGACTCGATTAGGTGTAAACAGAAAAGAAATGCAC	Cloning	Used to clone mu68 into NotI/XhoI-cut pcDNA4/TO-2xStrep (N-terminal)
7	UL52-F	GAGAAGGGGGCGGCCATGAATCCGAGTACCCACGTGAG	Cloning	Used to clone UL52 into NotI/XhoI-cut pcDNA4/TO-2xStrep (N-terminal)
8	UL52-R	GCCCTCTAGACTCGATTAGACATACTTGTCTATCACGTACG	Cloning	Used to clone UL52 into NotI/XhoI-cut pcDNA4/TO-2xStrep (N-terminal)
9	UL32-nest-F	GTCTGGGACCGCAGCGCGCAGTCGG	Cloning	Used for nested PCR to amplify UL32 from genomic DNA
10	UL32-nest-R	ACGGCAAGGAGCGCCGGCGGTCGCG	Cloning	Used for nested PCR to amplify UL32 from genomic DNA
11	UL32-F	GAGAAGGGGGCGGCCATGGCAACTTCGCCCCCC	Cloning	Used to clone UL32 into NotI/XhoI-cut pcDNA4/TO-2xStrep (N-terminal)
12	UL32-R	GCCCTCTAGACTCGATCATACATAGGTACACAGGGTGTGC	Cloning	Used to clone UL32 into NotI/XhoI-cut pcDNA4/TO-2xStrep (N-terminal)
13	pUE1-F	TGATCGACCTGCAGGCATGC	Cloning	Used for inverse PCR to generate pUE1-TSP backbone
14	pUE1-R	GGGCCCCTGGAACAGAACTTCC	Cloning	Used for inverse PCR to generate pUE1-TSP backbone
15	pUE1-ORF68-F	CTGTTCCAGGGGCCCATGTTTGTTCCCTGGCAACTCG	Cloning	Used to clone ORF68 into PCR-amplified pUE1-TSP
16	pUE1-ORF68-R	CCTGCAGGTCGATCAAGCGTACAAGTGTGACGTCTG	Cloning	Used to clone ORF68 into PCR-amplified pUE1-TSP
17	pUE1-BFLF1-F	CTGTTCCAGGGGCCCATGGAGGACTTTGTGCCCTGG	Cloning	Used to clone BFLF1 into PCR-amplified pUE1-TSP
18	pUE1-BFLF1-R	CCTGCAGGTCGATCACACGTAGACCTGGGAAGTTTG	Cloning	Used to clone BFLF1 into PCR-amplified pUE1-TSP
19	pUE1-UL32-F	CTGTTCCAGGGGCCCATGGCAACTTCGCCCCCC	Cloning	Used to clone UL32 into PCR-amplified pUE1-TSP
20	pUE1-UL32-R	CCTGCAGGTCGATCATCATACATAGGTACACAGGGTGTGC	Cloning	Used to clone UL32 into PCR-amplified pUE1-TSP
21	pLJM1-Nstrep-ORF68-F	CGCTAGCGCTACCGGATGTGGAGCCACCCCCAG	Cloning	Used to subclone NSTREP-ORF68 into AgeI/EcoRI-cut pLJM1-zeo
22	pLJM1-Nstrep-ORF68-R	TCGAGGTCGAGAATTTTAAGCGTACAAGTGTGACGTCTG	Cloning	Used to subclone NSTREP-ORF68 into AgeI/EcoRI-cut pLJM1-zeo
23	pLJM1-Nstrep-BFLF1-F	CGCTAGCGCTACCGGATGTGGAGCCACCCCCAG	Cloning	Used to subclone NSTREP-BFLF1 into AgeI/EcoRI-cut pLJM1-zeo
24	pLJM1-Nstrep-BFLF1-R	TCGAGGTCGAGAATTTTACACGTAGACCTGGGAAGTTTG	Cloning	Used to subclone NSTREP-BFLF1 into AgeI/EcoRI-cut pLJM1-zeo
25	pLJM1-Nstrep-mu68-F	CGCTAGCGCTACCGGATGTGGAGCCACCCCCAG	Cloning	Used to subclone NSTREP-mu68 into AgeI/EcoRI-cut pLJM1-zeo
26	pLJM1-Nstrep-mu68-R	TCGAGGTCGAGAATTTTAGGTGTAAACAGAAAAGAAATGC	Cloning	Used to subclone NSTREP-mu68 into AgeI/EcoRI-cut pLJM1-zeo
27	pLJM1-Nstrep-UL52-F	CGCTAGCGCTACCGGATGTGGAGCCACCCCCAG	Cloning	Used to subclone NSTREP-UL52 into AgeI/EcoRI-cut pLJM1-zeo
28	pLJM1-Nstrep-UL52-R	TCGAGGTCGAGAATTTTAGACATACTTGTCTATCACGTAC	Cloning	Used to subclone NSTREP-UL52 into AgeI/EcoRI-cut pLJM1-zeo
29	pLJM1-UL32-F	CGCTAGCGCTACCGGATGGCAACTTCGCCCCCC	Cloning	Used to subclone tagless UL32 into AgeI/EcoRI-cut pLJM1-zeo
30	pLJM1-UL32-R	TCGAGGTCGAGAATTTCATACATAGGTACACAGGGTG	Cloning	Used to subclone tagless UL32 into AgeI/EcoRI-cut pLJM1-zeo
31	ORF68-C52A-F	GCCagggtctgtcagctcctattttctctggtc	Cloning	Inverse PCR mutagenesis to generate ORF68 C52A
32	ORF68-C52-R	gggggaagatggttggagcgactggtgaat	Cloning	Inverse PCR mutagenesis to generate ORF68 C52A
33	ORF68-C373A-F	GCCgccctcaatgctaaggtggtgtcagaggac	Cloning	Inverse PCR mutagenesis to generate ORF68 C373A
34	ORF68-C373-R	cagcgggtcgcagaacaggtgcttgtgaatttc	Cloning	Inverse PCR mutagenesis to generate ORF68 C373A
35	ORF68-C191A/192A-F	GCCGCCcagattacagacaccaccaccgcacccgcg	Cloning	Inverse PCR mutagenesis to generate ORF68 C191A/C192A
36	ORF68-C191-R	tggggtggggccggtggcctcctccttgtc	Cloning	Inverse PCR mutagenesis to generate ORF68 C191A/C192A
37	ORF68-C415A-F	GCCgaggtcgtgcagactttggtctttctcttt	Cloning	Inverse PCR mutagenesis to generate ORF68 C415A
38	ORF68-C415-R	gtcgaacagggtgttggcatcgaggagctg	Cloning	Inverse PCR mutagenesis to generate ORF68 C415A
39	ORF68-H452A-F	GCCcgcctagacctggcccacccctcacagacg	Cloning	Inverse PCR mutagenesis to generate ORF68 H452A
40	ORF68-H452-R	tctttttagttgtgcggttagctcccgaat	Cloning	Inverse PCR mutagenesis to generate ORF68 H452A
41	ORF68-C79A-F	GCCttcttctgtctatacgccccacactgctgg	Cloning	Inverse PCR mutagenesis to generate ORF68 C79A
42	ORF68-C79-R	gaggcaggcatagtcctcgaagaaacccat	Cloning	Inverse PCR mutagenesis to generate ORF68 C79A
43	UL32-C128A-F	GCCctggtctgccgcaccatcgagctgtacaag	Cloning	Inverse PCR mutagenesis to generate UL32 C128A
44	UL32-C128-R	gggccggtccagcgcgaaggtgtcgatggc	Cloning	Inverse PCR mutagenesis to generate UL32 C128A
45	UL32-C502A-F	GCCgccatcacggagatggaggttgacccctgg	Cloning	Inverse PCR mutagenesis to generate UL32 C502A
46	UL32-C502-R	catggggtcacagaacatgtgcttaaagat	Cloning	Inverse PCR mutagenesis to generate UL32 C502A
47	UL32-C308A/C309A-F	GCCGCCacgcgcgccgccgctcgcaacggggaattc	Cloning	Inverse PCR mutagenesis to generate UL32 C308A/C309A
48	UL32-C308-R	gctgtccccgcccccgcgccgaccctccgt	Cloning	Inverse PCR mutagenesis to generate UL32 C308A/C309A
49	UL32-C544A-F	GCCatagcgttgcgtgccctcatctacaccttc	Cloning	Inverse PCR mutagenesis to generate UL32 C544A
50	UL32-C544-R	gacacgcccctcgaactcgttcccgcaggc	Cloning	Inverse PCR mutagenesis to generate UL32 C544A
51	UL32-H581A-F	GCCtcgatctcgctcctgtccctggagcacacc	Cloning	Inverse PCR mutagenesis to generate UL32 H581A
52	UL32-H581-R	gcgtctaagcagcgcgcccgcctcacggac	Cloning	Inverse PCR mutagenesis to generate UL32 H581A
53	UL32-C155A-F	GCCgccaaatgcctgggggcgccccactgcgcc	Cloning	Inverse PCR mutagenesis to generate UL32 C155A
54	UL32-C155-R	gagaaacgcgtaatcggccacccactgggg	Cloning	Inverse PCR mutagenesis to generate UL32 C155A
55	ORF68-K435A-F	GCCaccacctcactagacattattcgggagcta	Cloning	Inverse PCR mutagenesis to generate ORF68 K435A
56	ORF68-K435-R	ccccaccctggcgttttggagacccttaaa	Cloning	Inverse PCR mutagenesis to generate ORF68 K435A
57	ORF68-R443A-F	GCCgagctaaccgcacaactaaaaagacaccgc	Cloning	Inverse PCR mutagenesis to generate ORF68 R443A
58	ORF68-R443-R	aataatgtctagtgaggtggttttccccac	Cloning	Inverse PCR mutagenesis to generate ORF68 R443A
59	ORF68-K450A/R451A-F	GCCGCCcaccgcctagacctggcccacccctcacag	Cloning	Inverse PCR mutagenesis to generate ORF68 K450A/R451A
60	ORF68-K450-R	tagttgtgcggttagctcccgaataatgtc	Cloning	Inverse PCR mutagenesis to generate ORF68 K450A/R451A
61	ORF68-K174A/R179A/K182A-F	GCCacgtcctggcccGCCacagacGCCgaggaggccaccggccccaccccatgctgc	Cloning	Inverse PCR mutagenesis to generate ORF68 K174A/R179A/K182A
62	ORF68-K174-R	gaagcagaagttgcaggtgatggtgcctgt	Cloning	Inverse PCR mutagenesis to generate ORF68 K174A/R179A/K182A
63	ORF68-R14A-F	GCCgatgagctccaaaaactactggcagcctcc	Cloning	Inverse PCR mutagenesis to generate ORF68 R14A
64	ORF68-R14-R	gtgacgggtaattgtaccgagttgccaggg	Cloning	Inverse PCR mutagenesis to generate ORF68 R14A
65	ORF68-K310A-F	GCCgcgctgcagacccttcagtgcgaggtaatg	Cloning	Inverse PCR mutagenesis to generate ORF68 K310A
66	ORF68-K310-R	gggtgcctctgggtgtgccgcaaggcactc	Cloning	Inverse PCR mutagenesis to generate ORF68 K310A
67	ORF68-K395A/K396A-F	GCGGCGctcagggcatccgcggccgccggacagctc	Cloning	Inverse PCR mutagenesis to generate ORF68 K395A/K396A
68	ORF68-K395-R	atactcctgctccctgggcaggcggaatag	Cloning	Inverse PCR mutagenesis to generate ORF68 K395A/K396A
69	ORF57Pr-F	cagtgttttgccagcaagtg	qPCR	qPCR to measure DNA replication upon lytic reactivation
70	ORF57Pr-R	gggctattttgggaacctg	qPCR	qPCR to measure DNA replication upon lytic reactivation
71	CTGFPr-F	cgaggaatgtccctgtttgt	qPCR	qPCR to measure DNA replication upon lytic reactivation
72	CTGFPr-R	actggctgtctcctctcagc	qPCR	qPCR to measure DNA replication upon lytic reactivation
73	dsLBS_10bp	/56-FAM/TCCCGCCCGG-3' + 5'-CCGGGCGGGA-3'	EMSA	Used for EMSAs to measure ORF68 binding to dsDNA
74	dsLBS1_20bp	/56-FAM/TCCCGCCCGGGCATGGGGCC-3' + 5'-GGCCCCATGCCCGGGCGGGA-3'	EMSA	Used for EMSAs to measure ORF68 binding to dsDNA
75	dsLBS_30bp	/56-FAM/CGCCTCCCGCCCGGGCATGGGGCCGCGCGC-3' + 5'-GCGCGCGGCCCCATGCCCGGGCGGGAGGCG-3'	EMSA	Used for EMSAs to measure ORF68 binding to dsDNA
76	dsSCRAM_20bp	/56-FAM/TTGGTTGCCAAGACGACATC-3' + 5'-GATGTCGTCTTGGCAACCAA-3'	EMSA	Used for EMSAs to measure ORF68 binding to dsDNA
